# Supplementary material
Source: PubMed Central journal article supplement (PMC5798383)
Supplement: pnas.201719709SI.pdf [file pnas.201719709SI.pdf]

# Supporting Information

Tong et al. 10.1073/pnas.1719709115

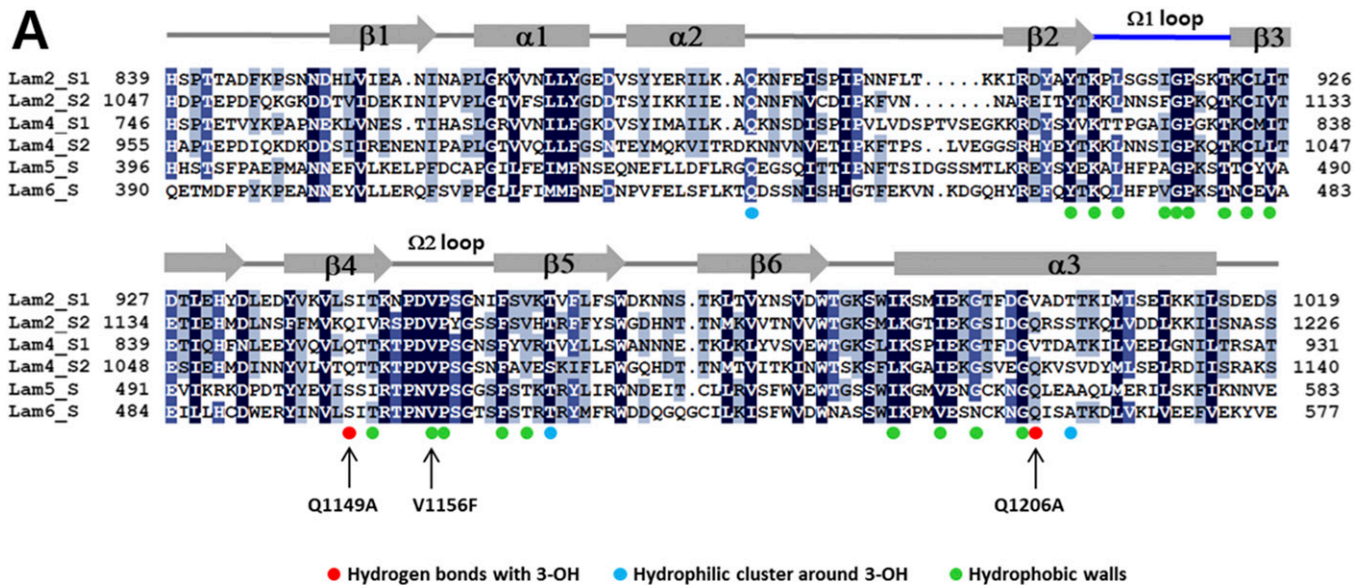

The C-terminal sequences of LAM StArkin domains

|          | $\alpha 3$  |                                         |
|----------|-------------|-----------------------------------------|
| LAM2 SD1 | <u>KKII</u> | 1015-SDEDSNINSKHQASNNESEEEIINLPTIG-1043 |
| LAM2 SD2 | <u>KKII</u> | 1222-SNASSTKKSRRRGKTVNKRKSSPSTIK-1250   |
| LAM4 SD1 | <u>GNIL</u> | 927-TRSATKRKRSSKENTVTVSTLPKMEPSSH-955   |
| LAM4 SD2 | <u>RDII</u> | 1135-SARAKSKKPVKKVMKSHDKHRPFHSK-1160    |
| LAM6 SD  | <u>EEFV</u> | 569-EKYVELSKEKADTLKPLPSVTSFGS           |

## B

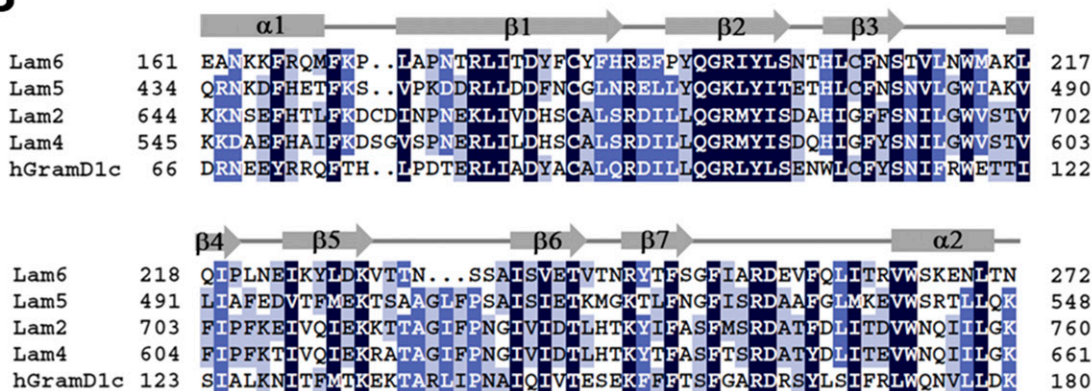

Fig. S1. Sequence alignments of yeast LAM SDs. (A) The sequences of the SDs of Lam2, Lam4, Lam5, and Lam6 from *Saccharomyces cerevisiae* were aligned. (Top) The secondary structure elements for the Lam2 SD2. (Bottom) Sequences of the C-terminal extensions of the LAM SDs. (B) The sequence alignments of the PH-like domains of Lam2, Lam4, Lam5, Lam6, and human GramD1c.

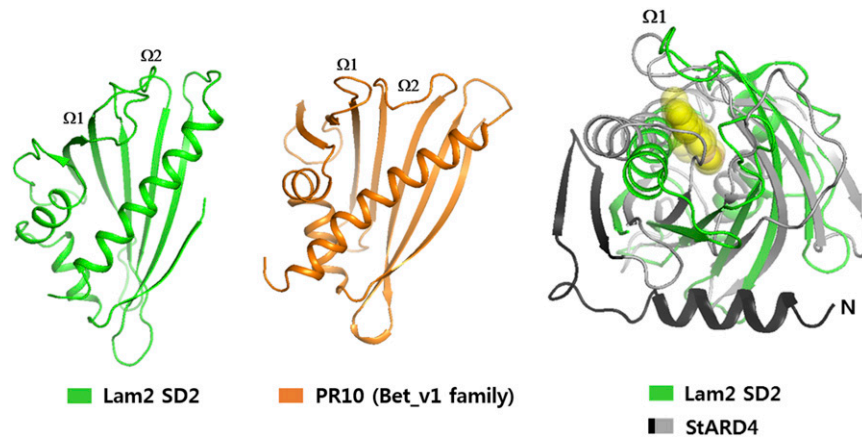

**Fig. S2.** Structural comparison of the LAM SD with a Bet\_v1 family protein and STARD4. The ribbon structures of the Lam2 SD2 and PR10 of the Bet\_v1 family are shown side by side. The PR10 (PDB id: 1IFV) was found to be structurally similar with the rmsd of 2.7 Å by DALI search in the Protein Data Bank. (*Right*) Structural superposition with a sterol-transfer protein, STARD4 (PDB id: 1JSS), of the StART family.

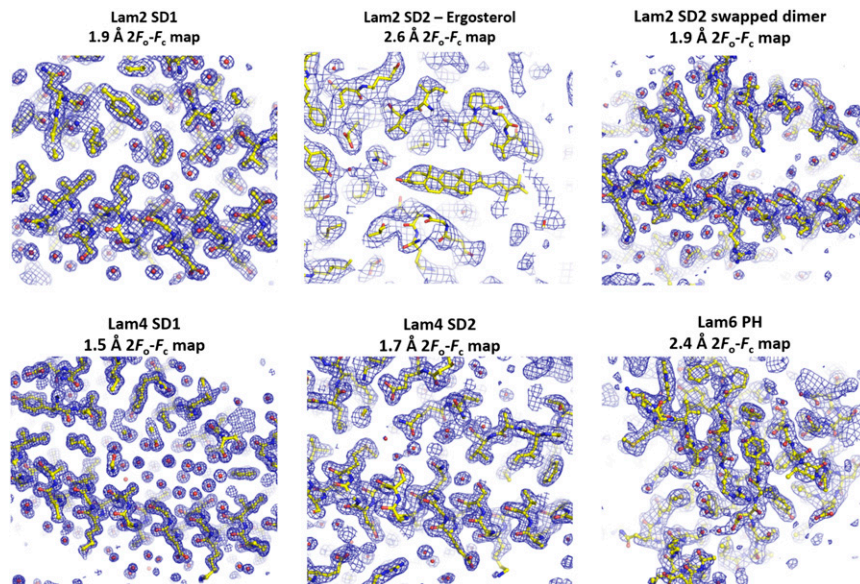

**Fig. S3.** The electron density maps. The  $2F_o - F_c$  maps of the structures determined in this study are shown with the final models superimposed.

**Table S1. Data collection and refinement statistics**

| Crystal                                    | Lam2 SD1           | Lam2 SD2 Swap dimer                                 | Lam2 SD2-ergosterol complex | Lam4 SD1 Se-Met                   | Lam4 SD1           | Lam4 SD2           | Lam6 PH               |
|--------------------------------------------|--------------------|-----------------------------------------------------|-----------------------------|-----------------------------------|--------------------|--------------------|-----------------------|
| Construct                                  | Residue 850–1,016  | Residue 1,060–1,223                                 | Residue 1,060–1,223         | Residue 749–929                   | Residue 749–929    | Residue 953–1,137  | T4L – Residue 161–272 |
| Beamline                                   | PLS-7A             | PLS-7A                                              | PLS-7A                      | PLS-7A                            | PLS-7A             | PLS-7A             | PLS-7A                |
| Wavelength, Å                              | 0.97950            | 0.97950                                             | 0.97950                     | 0.97931                           | 0.97950            | 0.97950            | 0.97950               |
| Space group                                | $P2_12_12_1$       | $P1$                                                | $C2$                        | $P2_1$                            | $P2_1$             | $I222$             | $P2_12_12_1$          |
| Unit-cell parameters                       | 33.4, 59.5, 84.3   | 33.9, 52.1, 53.0,                                   | 189.7, 70.3,                | 38.9, 55.0, 119.4, $\beta = 94.9$ | 38.8, 55.0, 119.5, | 68.3, 89.1, 111.3  | 59.5, 60.1, 105.6     |
| $a, b, c$ (Å), $\alpha, \beta, \gamma$ (°) |                    | $\alpha = 107.8, \beta = 90.2,$<br>$\gamma = 105.1$ | $41.5, \beta = 103.1$       |                                   | $\beta = 95.1$     |                    |                       |
| Rotation range, Å                          | 50–1.6 (1.63–1.60) | 50–1.9 (1.93–1.90)                                  | 50–2.6 (2.64–2.60)          | 50–2.0 (2.03–2.00)                | 50–1.5 (1.50–1.53) | 50–1.7 (1.73–1.70) | 50–2.4 (2.44–2.40)    |
| No. of reflections                         | 128,373            | 64,364                                              | 80,718                      | 135,971                           | 327,744            | 333,245            | 123,116               |
| No. of unique reflections                  | 22,632 (1,117)     | 25,976 (1,273)                                      | 16,717 (845)                | 33,700 (1,718)                    | 80,061 (3,964)     | 37,918 (1,880)     | 15,204 (727)          |
| Multiplicity                               | 5.7 (5.8)          | 2.5 (2.5)                                           | 4.8 (4.8)                   | 4.0 (4.2)                         | 4.1 (4.1)          | 8.8 (8.9)          | 8.1 (9.4)             |
| Mean $I/\sigma(I)$                         | 45.5 (5.3)         | 32.3 (5.5)                                          | 48.9 (6.9)                  | 40.1 (15.2)                       | 31.6 (4.8)         | 51.7 (8.2)         | 48.3 (9.7)            |
| Completeness, %                            | 98.6 (100)         | 97.4 (96.6)                                         | 99.0 (99.8)                 | 98.5 (99.0)                       | 99.6 (99.0)        | 99.6 (100)         | 99.0 (100.0)          |
| $R_{\text{merge}}$ , %                     | 6.0 (42.7)         | 4.5 (27.9)                                          | 3.9 (33.1)                  | 13.9 (42.8)                       | 6.2 (37.1)         | 7.1 (38.3)         | 9.8 (41.2)            |
| Wilson $B$ factor, Å                       | 22.7               | 28.0                                                | 63.5                        | 18.4                              | 14.3               | 21.7               | 41.7                  |
| Refinement                                 |                    |                                                     |                             |                                   |                    |                    |                       |
| $R_{\text{work}}$ , %                      | 20.6 (22.3)        | 19.4 (22.0)                                         | 24.4 (31.4)                 | 17.9 (26.2)                       | 15.8 (18.6)        | 20.2 (25.6)        | 23.5 (28.1)           |
| $R_{\text{free}}$ , %                      | 24.6 (24.6)        | 24.2 (28.7)                                         | 29.3 (37.7)                 | 19.3 (30.7)                       | 21.1 (27.8)        | 24.2 (31.6)        | 27.0 (35.8)           |
| rmsd bond lengths, Å                       | 0.006              | 0.006                                               | 0.010                       | 0.008                             | 0.005              | 0.007              | 0.008                 |
| rmsd bond angles, °                        | 0.746              | 0.862                                               | 1.165                       | 0.890                             | 0.731              | 0.923              | 1.092                 |
| $B$ factor, Å <sup>2</sup>                 |                    |                                                     |                             |                                   |                    |                    |                       |
| Molecule A (B, C)                          | 25.4               | 33.2 (32.5)                                         | 66.6 (68.7, 87.0)           |                                   | 20.9 (20.8, 21.4)  | 24.8 (29.3)        | 57.9                  |
| Ligands                                    | —                  | —                                                   | 77.4 (74.9)                 | —                                 | —                  | —                  | 65.5 (PEG)            |
| Water                                      | 32.0               | 37.2                                                | 61.8                        | —                                 | 34.1               | 33.0               | 53.9                  |
| No. of non-H atoms                         |                    |                                                     |                             |                                   |                    |                    |                       |
| Protein                                    | 1,328              | 2,537                                               | 3,775                       | —                                 | 4,131              | 2,920              | 2,199                 |
| Ligand                                     | —                  | —                                                   | 58 (ergosterol)             | —                                 | —                  | —                  | —                     |
| Solvent                                    | 119                | 223                                                 | 23                          | —                                 | 837                | 352                | 32                    |
| Ramachandran statistics                    |                    |                                                     |                             |                                   |                    |                    |                       |
| Favored, %                                 | 97.53              | 96.13                                               | 88.21                       | —                                 | 96.65              | 98.09              | 91.76                 |
| Disallowed, %                              | 0                  | 0.32                                                | 1.75                        | —                                 | 0                  | 0                  | 2.62                  |
| PDB entry                                  | 5YQI               | 5YQQ                                                | 5YSO                        | —                                 | 5YQJ               | 5YQP               | 5YQR                  |

Values in parentheses indicate the highest-resolution shell.
